# Supplementary material for: Hydrological Modelling for Siberian Crane Grus Leucogeranus Stopover Sites in Northeast China
Source: PLoS One. 2015 Apr 15;10(4):e0122687. doi: 10.1371/journal.pone.0122687 (PMC4398425; doi:10.1371/journal.pone.0122687)
Supplement: S1 File — (XLSX) [file pone.0122687.s001.xlsx]

## Sheet: data
Spring			Autumn
Year	Day	Number	Year	Day	Number
2008	3.17	7	2008	8.12	6
	3.19	32		8.14	6
	3.21	27		8.16	6
	3.23	87		8.18	6
	3.25	117		8.2	6
	3.27	227		8.22	6
	3.29	630		8.24	6
	3.31	0		8.26	6
	4.2	13		8.28	6
	4.4	25		8.3	6
	4.6	1523		9.1	6
	4.8	1359		9.3	18
	4.10	2162		9.5	30
	4.12	2035		9.7	28
	4.14	0		9.9	26
	4.16	1846		9.11	29
	4.18	1595		9.13	25
	4.20	1903		9.15	21
	4.22	1439		9.17	31
	4.24	1670		9.19	40
	4.26	1611		9.21	41
	4.28	858		9.23	42
	4.30	1110		9.25	43
	5.2	1361		9.27	57
	5.4	1613		9.29	71
	5.6	1420		10.1	85
	5.8	1226		10.3	129
	5.1	142		10.5	173
	5.12	5		10.7	688
	5.14	5		10.9	877
	5.16	5		10.11	1409
	5.18	5		10.13	1850
	5.2	5		10.15	2036
				10.17	1753
				10.19	1743
				10.21	1663
				10.23	1582
				10.25	1659
				10.27	745
				10.29	1496
				10.31	1447
				11.2	2074
				11.4	352
				11.6	332
				11.8	36
2009	3.15	3	2009	10.1	0
	3.17	40		10.3	177
	3.19	20		10.5	520
	3.21	20		10.7	1118
	3.23	10		10.9	1715
	3.25	5		10.11	2320
	3.27	0		10.13	1884
	3.29	0		10.15	1447
	3.31	0		10.17	1706
	4.2	0		10.19	1965
	4.4	0		10.21	2235
	4.6	107		10.23	2505
	4.8	0		10.25	1564
	4.1	88		10.27	623
	4.12	73		10.29	381
	4.14	146		10.31	139
	4.16	26		11.2	3
	4.18	85
	4.2	45
	4.22	41
	4.24	24
	4.26	123
	4.28	213
	4.3	2616
	5.2	2259
	5.4	2035
	5.6	1120
	5.8	1106
	5.1	261
	5.12	90
	5.14	69
2010	3.29	18	2010	9.25	0
	3.31	75		9.27	51
	4.2	131		9.29	152
	4.4	226		10.1	392
	4.6	320		10.3	738
	4.8	160		10.5	1084
	4.10	0		10.7	1725
	4.12	698		10.9	2164
	4.14	847		10.11	2603
	4.16	997		10.13	2731
	4.18	1146		10.15	2858
	4.20	1211		10.17	2916
	4.22	1275		10.19	2973
	4.24	1383		10.21	3015
	4.26	1490		10.23	2902
	4.28	1379		10.25	2789
	4.3	1268		10.27	1673
	5.2	2305		10.29	1389
	5.4	1653		10.31	1381
	5.6	1613		11.2	340
	5.8	1572		11.4	328
	5.1	1084		11.6	391
	5.12	1441		11.8	10
	5.14	154		11.1	6
	5.16	32		11.12	5
	5.18	45
	5.2	0
	5.22	0
	5.24	0
	5.26	0
2011	3.13	0
	3.15	0
	3.17	0
	3.19	22
	3.21	47
	3.23	0
	3.25	0
	3.27	3
	3.29	5
	3.31	404
	4.2	524
	4.4	643
	4.6	1021
	4.8	1210
	4.1	1398
	4.12	1598
	4.14	2148
	4.16	2214
	4.18	2279
	4.2	2311
	4.22	2343
	4.24	2384
	4.26	2345
	4.28	2353
	4.3	2434
	5.2	2514
	5.4	2904
	5.6	2737
	5.8	2420
	5.10	2072
	5.12	1269
	5.14	466
	5.16	302
	5.18	137
	5.20	56
	5.22	11
	5.24	41
	5.26	40
	5.28	13
	5.30	13
	6.1	13
	6.3	5
	6.5	5
	6.7	5
